# Supplementary material for: Blood pressure‐independent renoprotective effects of small interference RNA targeting liver angiotensinogen in experimental diabetes
Source: PubMed Central journal article supplement (PMC10091936; doi:10.1111/bph.15955), 2022-10-02

# Blood pressure-independent renoprotective effects of small interference RNA targeting liver angiotensinogen in experimental diabetes

Edwyn O. Cruz-López<sup>1\*</sup>, Liwei Ren<sup>1,2\*</sup>, Estrellita Uijl<sup>1,3</sup>, Marian C. Clahsen-van Groningen<sup>4,5</sup>, Richard van Veghel<sup>1</sup>, Ingrid M. Garrelds<sup>1</sup>, Oliver Domenig<sup>6</sup>, Marko Poglitsch<sup>6</sup>,  
Ivan Zlatev<sup>7</sup>, Timothy Rooney<sup>7</sup>, Anne Kasper<sup>7</sup>, Paul Nioi<sup>7</sup>, Don Foster<sup>7</sup>, A.H. Jan Danser<sup>1</sup>

<sup>1</sup>*Division of Vascular Medicine and Pharmacology, Department of Internal Medicine, Erasmus MC, Rotterdam, The Netherlands;* <sup>2</sup>*Department of Pharmacy, Shenzhen People's Hospital (The Second Clinical Medical College, Jinan University, The First Affiliated Hospital, Southern University of Science and Technology), Shenzhen, China;*

<sup>3</sup>*Division of Nephrology and Transplantation, Department of Internal Medicine, Erasmus MC, Rotterdam, The Netherlands;* <sup>4</sup>*Department of Pathology, Erasmus MC, Rotterdam, The Netherlands;* <sup>5</sup>*Institute of Experimental Medicine and Systems Biology, University Hospital Aachen, RWTH Aachen University, Aachen, German;*

<sup>6</sup>*Attoquant Diagnostics, Vienna, Austria;* <sup>7</sup>*Alnylam Pharmaceuticals, Cambridge, MA, USA.*

*\*both authors contributed equally.*

**Correspondence:** Prof. dr. A. H. Jan Danser, PhD; Division of Pharmacology, room EE1418b, Erasmus MC, Wytemaweg 80, 3015 CN Rotterdam, The Netherlands (e-mail: a.danser@erasmusmc.nl).

## SUPPLEMENTAL MATERIAL

**Table S1.** List of qPCR primer sequences.

| <b>Gene</b>             |                | <b>Sequence (5' to 3')</b> |
|-------------------------|----------------|----------------------------|
| <i>Agt</i>              | Forward primer | CCAGCACGACTTCCTGACTT       |
|                         | Reverse primer | GCAGGTTGTAGGATCCCCGA       |
| <i>Renin</i>            | Forward primer | TGTGGTAACTGTGGGTGGAAT      |
|                         | Reverse primer | GCATGAAGGGTATCAGGGGC       |
| <i>AT<sub>1a</sub>R</i> | Forward primer | ATCACCAGGTCAAGTGGATTTTCG   |
|                         | Reverse primer | TTCCCACCACAAAGATGATGC      |
| <i>AT<sub>1b</sub>R</i> | Forward primer | CTGAATCTTGCCCTGGCTGA       |
|                         | Reverse primer | ACATAGGTGGTTGCCGAAGG       |
| <i>B2M</i>              | Forward primer | ATGGCTCGCTCGGTGACCG        |
|                         | Reverse primer | TGGGGAGTTTTCTGAATGGCAAGCA  |
| <i>Actb</i>             | Forward primer | GGGAAATCGTGCGTGACATT       |
|                         | Reverse primer | GCGGCAGTGGCCATCTC          |
| <i>Neph1</i>            | Forward primer | GGATGGCGGTAAGGTGGAGTG      |
|                         | Reverse primer | CGTTATTGATGGTGAGAGTGGACAG  |
| <i>Nephrin</i>          | Forward primer | CGTCAGCATCAGCAGCAACC       |
|                         | Reverse primer | AGCCACATCTTCCAGCCTCTC      |
| <i>Podocin</i>          | Forward primer | TGGACTCAGTGACCTGTGTTTGG    |
|                         | Reverse primer | CAGCAATCACCCGCACTTTGG      |
| <i>WT-1</i>             | Forward primer | TGTGACTTCAAGGACTGCGAGAG    |
|                         | Reverse primer | GGTGTGGGTCTTCAGGTGGTC      |

*Agt*, angiotensinogen; *AT<sub>1a</sub>R*, angiotensin II type 1a receptor; *AT<sub>1b</sub>R*, angiotensin II type 1b receptor; *B2M*,  $\beta_2$ -microglobulin; *Actb*,  $\beta$ -actin; *WT-1*, Wilms tumor-1.

**Table S2.** Angiotensin metabolites in blood, kidney and heart of diabetic Ren2 rats treated with either vehicle, valsartan, captopril, angiotensinogen (AGT) small interfering RNA (siRNA), AGT siRNA + valsartan, or captopril + valsartan for 3 weeks. Data are mean±SD of n=7-9. Numbers in combination with the symbol < denote the lower limit of quantification. \*P<0.05 versus vehicle.

| Angiotensin metabolite | vehicle  | valsartan  | captopril  | captopril+ valsartan | siRNA    | siRNA+ valsartan |
|------------------------|----------|------------|------------|----------------------|----------|------------------|
| <b>Blood (pmol/L)</b>  |          |            |            |                      |          |                  |
| Ang-(1-10) = Ang I     | 93±31    | 1,378±389* | 1,675±806* | 1,251±272*           | 94±40    | 42±39            |
| Ang-(1-8) = Ang II     | 45±13    | 633±170*   | 39±35      | 22±13                | 45±13    | 24±15            |
| Ang-(1-7)              | 8.2±0.6  | 38±19*     | 80±42*     | 44±5.7*              | 10±6.0   | <8               |
| Ang-(2-8) = Ang III    | 4.5±2.8  | 86±34*     | 8.0±11     | <2.5                 | 3.9±1.2  | 2.9±1.2          |
| Ang-(3-8) = Ang IV     | 3.5±1.7  | 59±21*     | 6.4±8.8    | 2.3±0.6              | 3.9±1.7  | 2.1±0.3          |
| Ang-(1-5)              | 10.4±3.0 | 136±59*    | 8.7±5.1    | 6.4±2.4              | 8.0±2.4  | 7.2±6.3          |
| Ang II/I ratio         | 0.5±0.1  | 0.5±0.0    | 0.0±0.0*   | 0.0±0.0*             | 0.5±0.1  | 0.7±0.1*         |
| <b>Kidney (fmol/g)</b> |          |            |            |                      |          |                  |
| Ang-(1-10) = Ang I     | 176±195  | 195±128    | 388±237*   | 131±103              | 21±14*   | <6*              |
| Ang-(1-8) = Ang II     | 606±158  | 140±93*    | 232±109*   | 68±97*               | 396±165* | 26±42*           |
| Ang-(1-7)              | 32±28    | 92±101     | 195±123*   | 51±50                | 23±11    | <15              |
| Ang-(2-8) = Ang III    | 41±22    | 24±48      | 33±35      | 10±12                | 25±12    | <6               |
| Ang-(3-8) = Ang IV     | <10      | <10        | <10        | <10                  | <10      | <10              |
| Ang-(1-5)              | 12±6.1   | 58±39*     | 7.5±4.3    | 7.0±4.0              | 6.0±2.0  | <5               |
| Ang II/I ratio         | 8.0±2.5  | 1.0±0.3    | 0.9±0.2    | 0.5±0.2              | 36±13*   | 4.3±2.6          |
| <b>Heart (fmol/g)</b>  |          |            |            |                      |          |                  |
| Ang-(1-10) = Ang I     | 18±14    | 99±42*     | 128±71*    | 67±26*               | <10      | <10              |
| Ang-(1-8) = Ang II     | 30±17    | 31±27      | 20±20      | 9.7±4.5*             | 15±17    | <8*              |
| Ang-(1-7)              | <15      | 25±28      | 55±56*     | <15                  | <15      | <15              |
| Ang-(2-8) = Ang III    | <10      | <10        | <10        | <10                  | <10      | <10              |
| Ang-(3-8) = Ang IV     | <10      | <10        | <10        | <10                  | <10      | <10              |
| Ang-(1-5)              | 5.4±1.2  | 65±22*     | 7.8±5.3    | 6.0±2.7              | 5.1±0.3  | <5               |
| Ang II/I ratio         | 2.3±1.6  | 0.3±0.2*   | 0.1±0.1*   | 0.2±0.0*             | 1.5±1.7  | 0.8±0.0*         |

**Table S3.** Main characteristics of diabetic Ren2 rats treated with either vehicle, valsartan, captopril, angiotensinogen (AGT) small interfering RNA (siRNA), AGT siRNA + valsartan, or captopril + valsartan for 3 weeks. Data prior to the induction of diabetes mellitus (DM) and treatment are also provided. Data are mean±SD. #P<0.001 versus non-DM; \*P<0.05 versus vehicle).

| Parameters                           | 0 weeks | 15 weeks             | 18 weeks |           |           |                      |           |                      |
|--------------------------------------|---------|----------------------|----------|-----------|-----------|----------------------|-----------|----------------------|
|                                      | non-DM  | DM                   | vehicle  | valsartan | captopril | captopril +valsartan | AGT siRNA | AGT siRNA +valsartan |
| N                                    | 47      | 47                   | 8        | 8         | 8         | 7                    | 9         | 7                    |
| <b>General</b>                       |         |                      |          |           |           |                      |           |                      |
| body weight (g)                      | 395±38  | 401±44               | 448±37   | 435±29    | 411±31    | 388±15*              | 422±44    | 416±46               |
| Δtreatment (g)                       |         |                      | 26±21    | 31±28     | 19±18     | 24±12                | 9.6±17    | 12±34                |
| food intake (g/day)                  | 25±6    | 35±12 <sup>#</sup>   | 25±10    | 28±8.3    | 38±6.7*   | 28±11                | 30±8.1    | 29±5.5               |
| water intake (mL/day)                | 38±8    | 136±52 <sup>#</sup>  | 119±55   | 123±56    | 173±58    | 133±67               | 150±76    | 113±59               |
| serum glucose (mmol/L)               |         |                      | 39±11    | 38±21     | 52±14     | 55±10                | 46±6      | 50±13                |
| insulin (U/day)                      |         |                      | 3.6±1.3  | 3.5±1.1   | 3.3±1.2   | 3.0±1.1              | 3.0±1.1   | 3.6±1.4              |
| <b>Blood</b>                         |         |                      |          |           |           |                      |           |                      |
| plasma ALT (U/L)                     | 56±14   | 181±130 <sup>#</sup> | 239±122  | 181±213   | 117±38    | 116±100              | 145±43    | 116±54               |
| plasma AST (U/L)                     | 85±30   | 280±267 <sup>#</sup> | 327±204  | 265±324   | 150±64    | 233±201              | 186±95    | 179±167              |
| serum K <sup>+</sup> (mmol/L)        |         |                      | 6.3±1.8  | 6.9±1.3   | 8.2±1.6   | 9.0±1.0*             | 7.2±2.3   | 7.7±1.3              |
| serum Na <sup>+</sup> (mmol/L)       |         |                      | 134±4.8  | 134±6.5   | 128±4.3   | 128±4.2              | 130±4.1   | 128±4.7              |
| plasma urea (mmol/L)                 | 5.1±0.9 | 8.9±1.6 <sup>#</sup> | 6.6±1.1  | 7.4±1.6   | 8.5±1.1   | 21±14*               | 8.7±1.5   | 14±4.5               |
| plasma creatinine (μmol/L)           | 25±5    | 19±4 <sup>#</sup>    | 19±2.1   | 23±4.8    | 19±3.8    | 41±24*               | 24±9.2    | 37±14*               |
| <b>Urine</b>                         |         |                      |          |           |           |                      |           |                      |
| urine volume (mL/day)                | 22±6    | 132±53 <sup>#</sup>  | 128±48   | 126±65    | 155±50    | 109±44               | 134±64    | 104±57               |
| K <sup>+</sup> excretion (mmol/day)  | 3.1±0.6 | 4.8±1.2 <sup>#</sup> | 3.5±1.7  | 4.3±1.6   | 4.6±1.4   | 3.0±0.9              | 3.7±1.2   | 3.9±1.6              |
| Na <sup>+</sup> excretion (mmol/day) | 2.3±0.6 | 3.3±1.1 <sup>#</sup> | 2.5±1.4  | 2.8±1.3   | 3.3±1.0   | 2.1±0.6              | 2.3±1.1   | 2.3±0.7              |
| urea excretion (mmol/day)            | 12±2.0  | 23±5.2 <sup>#</sup>  | 15±8.2   | 20±8.4    | 20±6.7    | 13±3.7               | 18±5.1    | 17±7.9               |
| creatinine excretion (μmol/day)      | 128±20  | 123±27               | 82±44    | 120±35    | 87±31     | 74±28                | 96±33     | 111±38               |
| creatinine clearance (mL/min)        | 3.8±0.9 | 4.6±1.2 <sup>#</sup> | 3.2±2.1  | 3.6±1.1   | 3.2±1.0   | 1.4±0.6              | 2.9±1.0   | 2.6±1.5              |

**Figure S1.** Systolic and diastolic blood pressure (SBP, DBP) in diabetic Ren2 rats treated with either vehicle, valsartan, captopril, angiotensinogen (AGT) small interfering RNA (siRNA), AGT siRNA + valsartan, or captopril + valsartan for 3 weeks. Treatment was started 15 weeks after the induction of diabetes. Days -3 to 0 correspond to the period immediately before treatment. Data are mean±SEM of n=7-9. \*P<0.05 versus vehicle and/or indicated group.

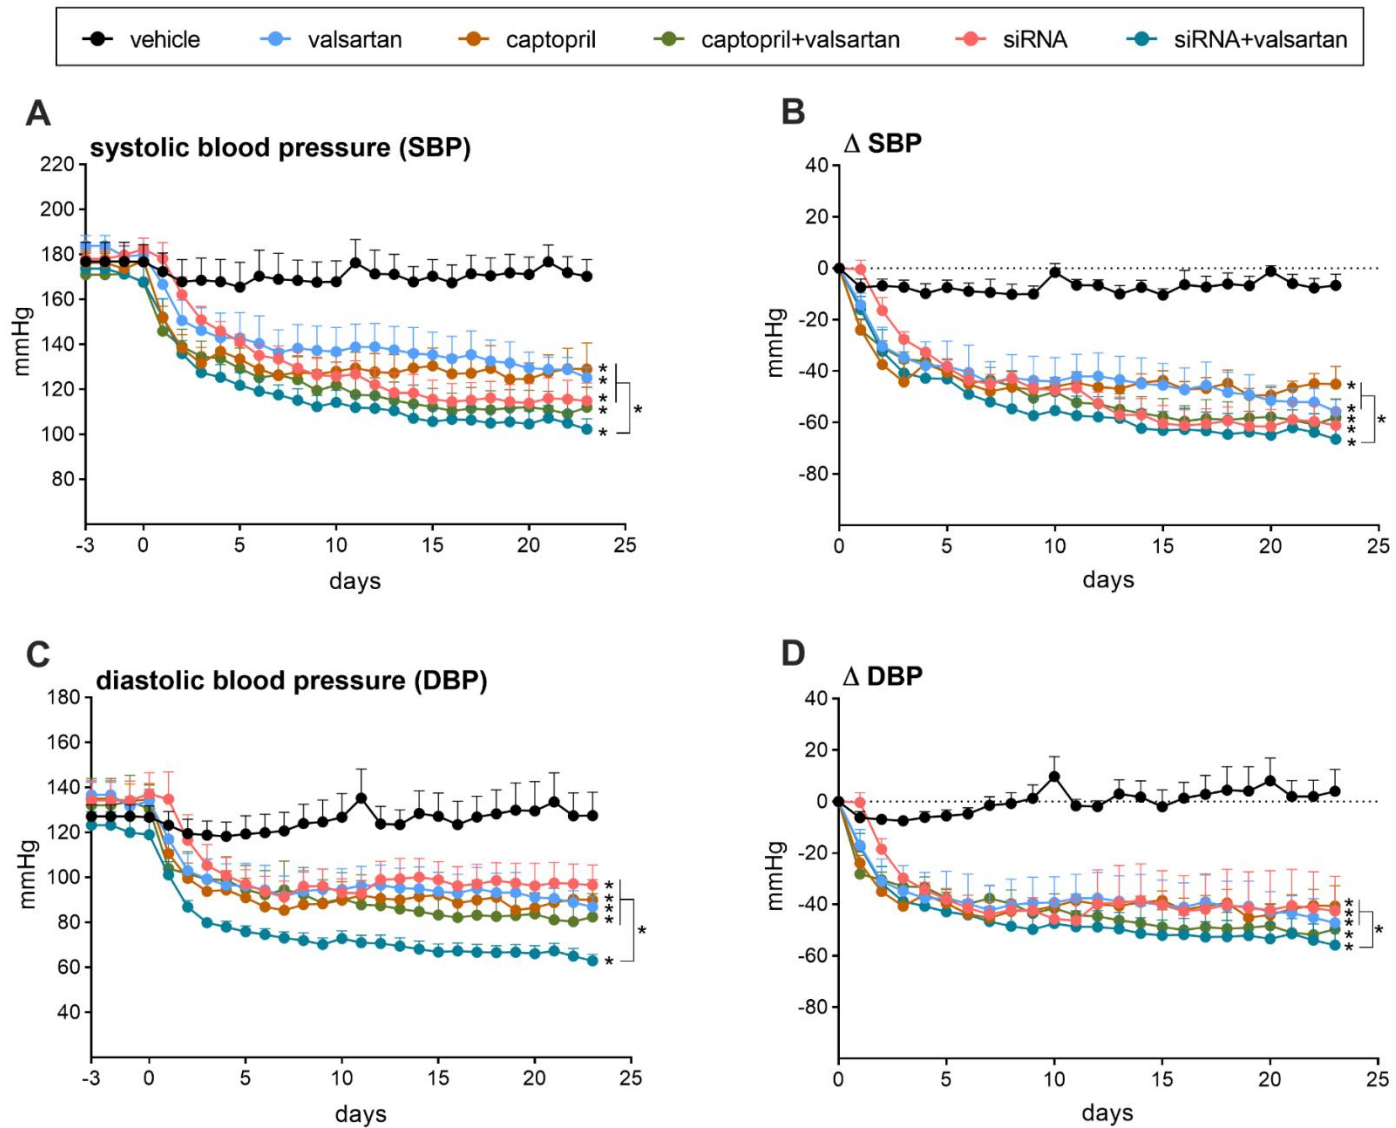

**Figure S2.** Effect of diabetes induction on the levels of angiotensinogen (A), renin, (B), and renin (C) in Ren2 rats after 15 weeks, and the relationship between renin (D) or prorenin (E) and angiotensinogen. Data are mean±SEM of n=47; \*P<0.0001.

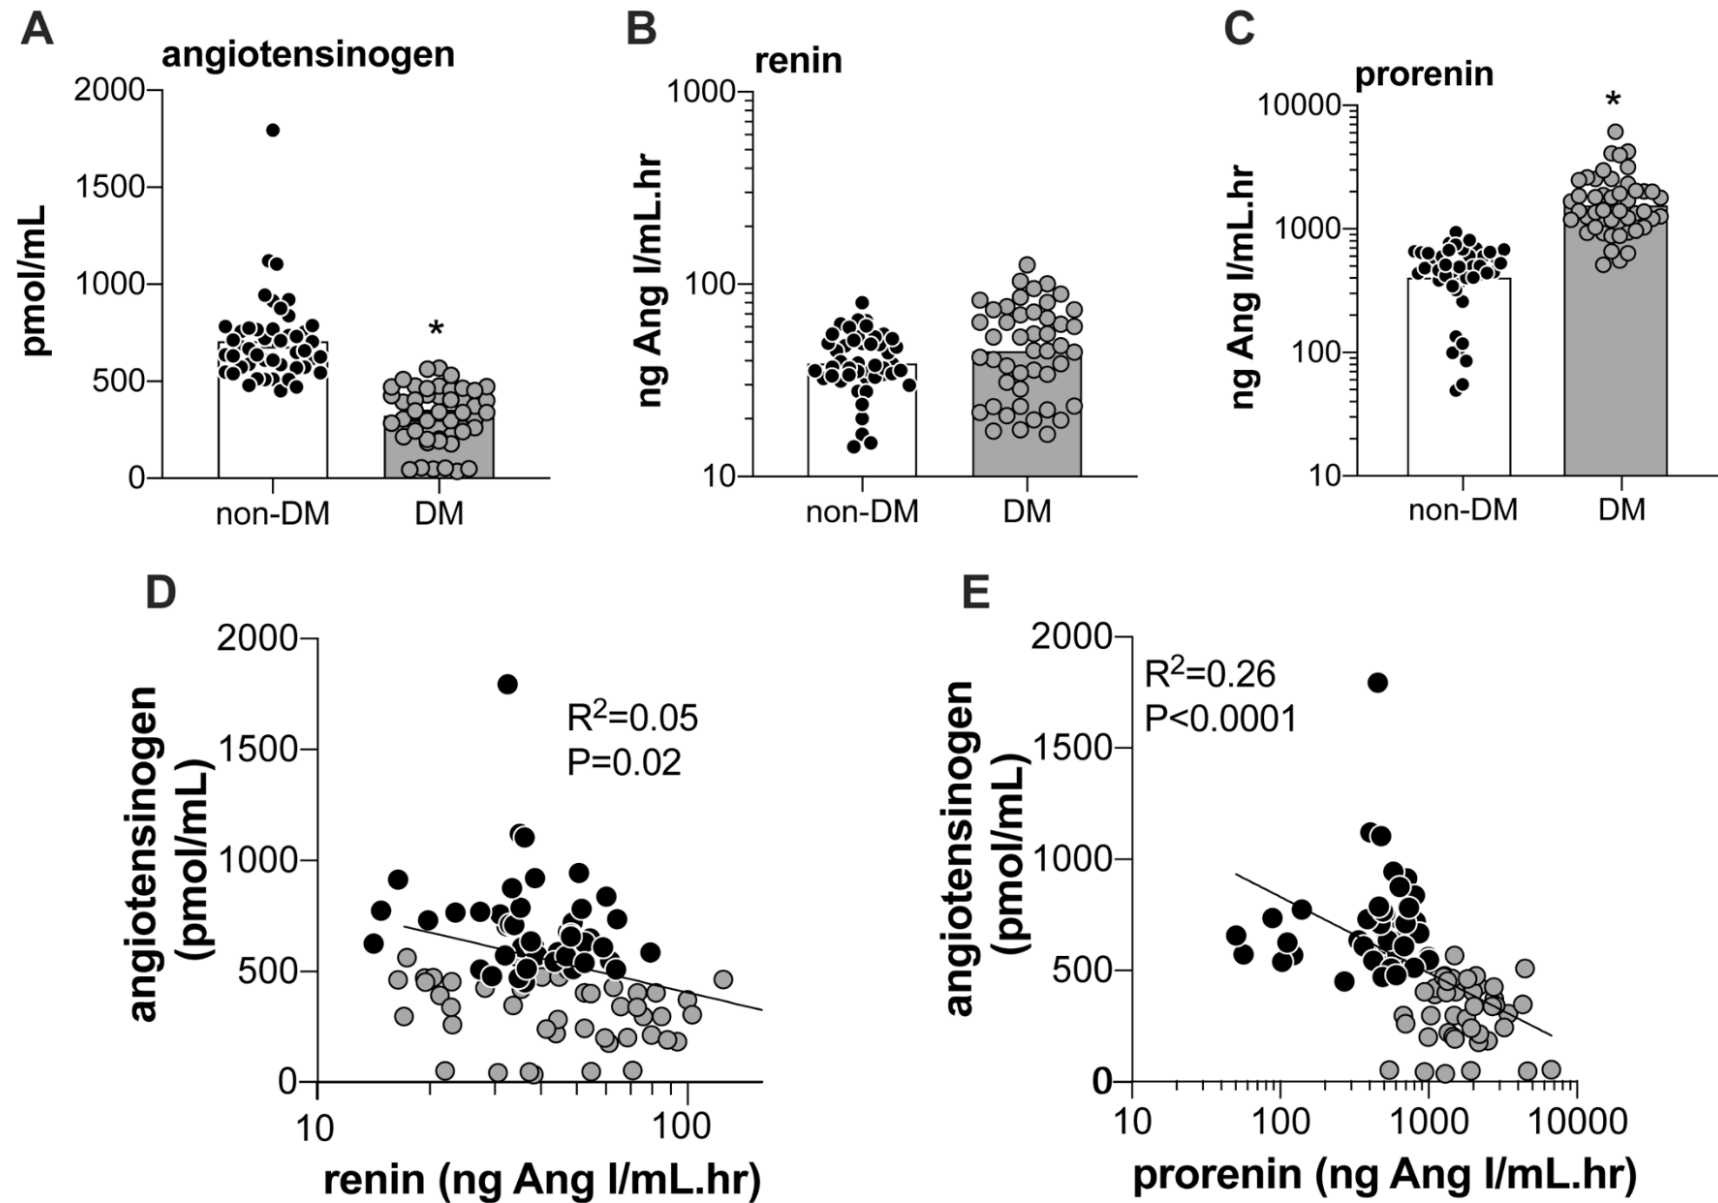

**Figure S3.** Hepatic (panel A) and renal (panel B) angiotensinogen levels in diabetic Ren2 rats treated with either vehicle, angiotensinogen (AGT) small interfering RNA (siRNA) or AGT siRNA + valsartan. Treatment was started 15 weeks after the induction of diabetes. Panel C shows the immunoblots. Data are mean±SEM of n=7-9. \*P<0.05 versus vehicle.

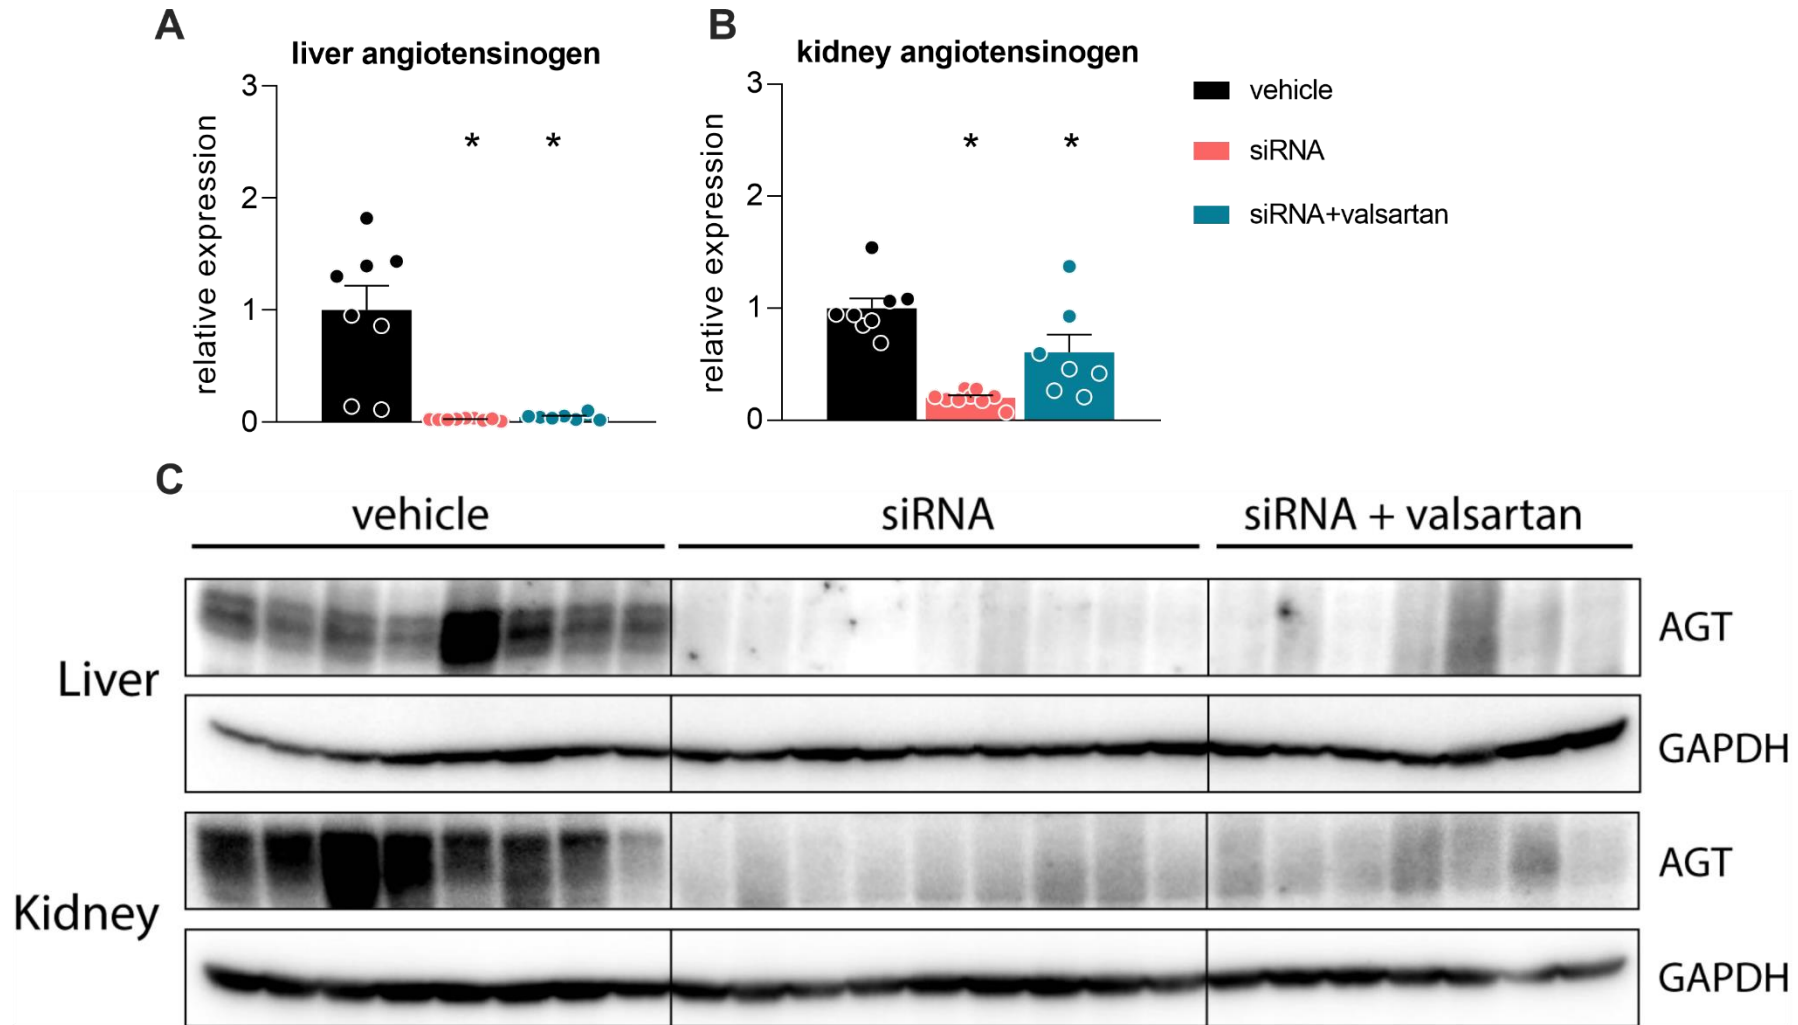

**Figure S4.** Renal expression of the angiotensin II type 1a and 1b ( $AT_{1a}$ ,  $AT_{1b}$ ) receptor (A and B), Neph1 (C), nephrin (D) and podocin (E) in diabetic Ren2 rats treated with either vehicle, valsartan, captopril, angiotensinogen (AGT) small interfering RNA (siRNA), AGT siRNA + valsartan, or captopril + valsartan for 3 weeks. Treatment was started 15 weeks after the induction of diabetes. Data are mean $\pm$ SEM of n=7-9. NS, not significant.

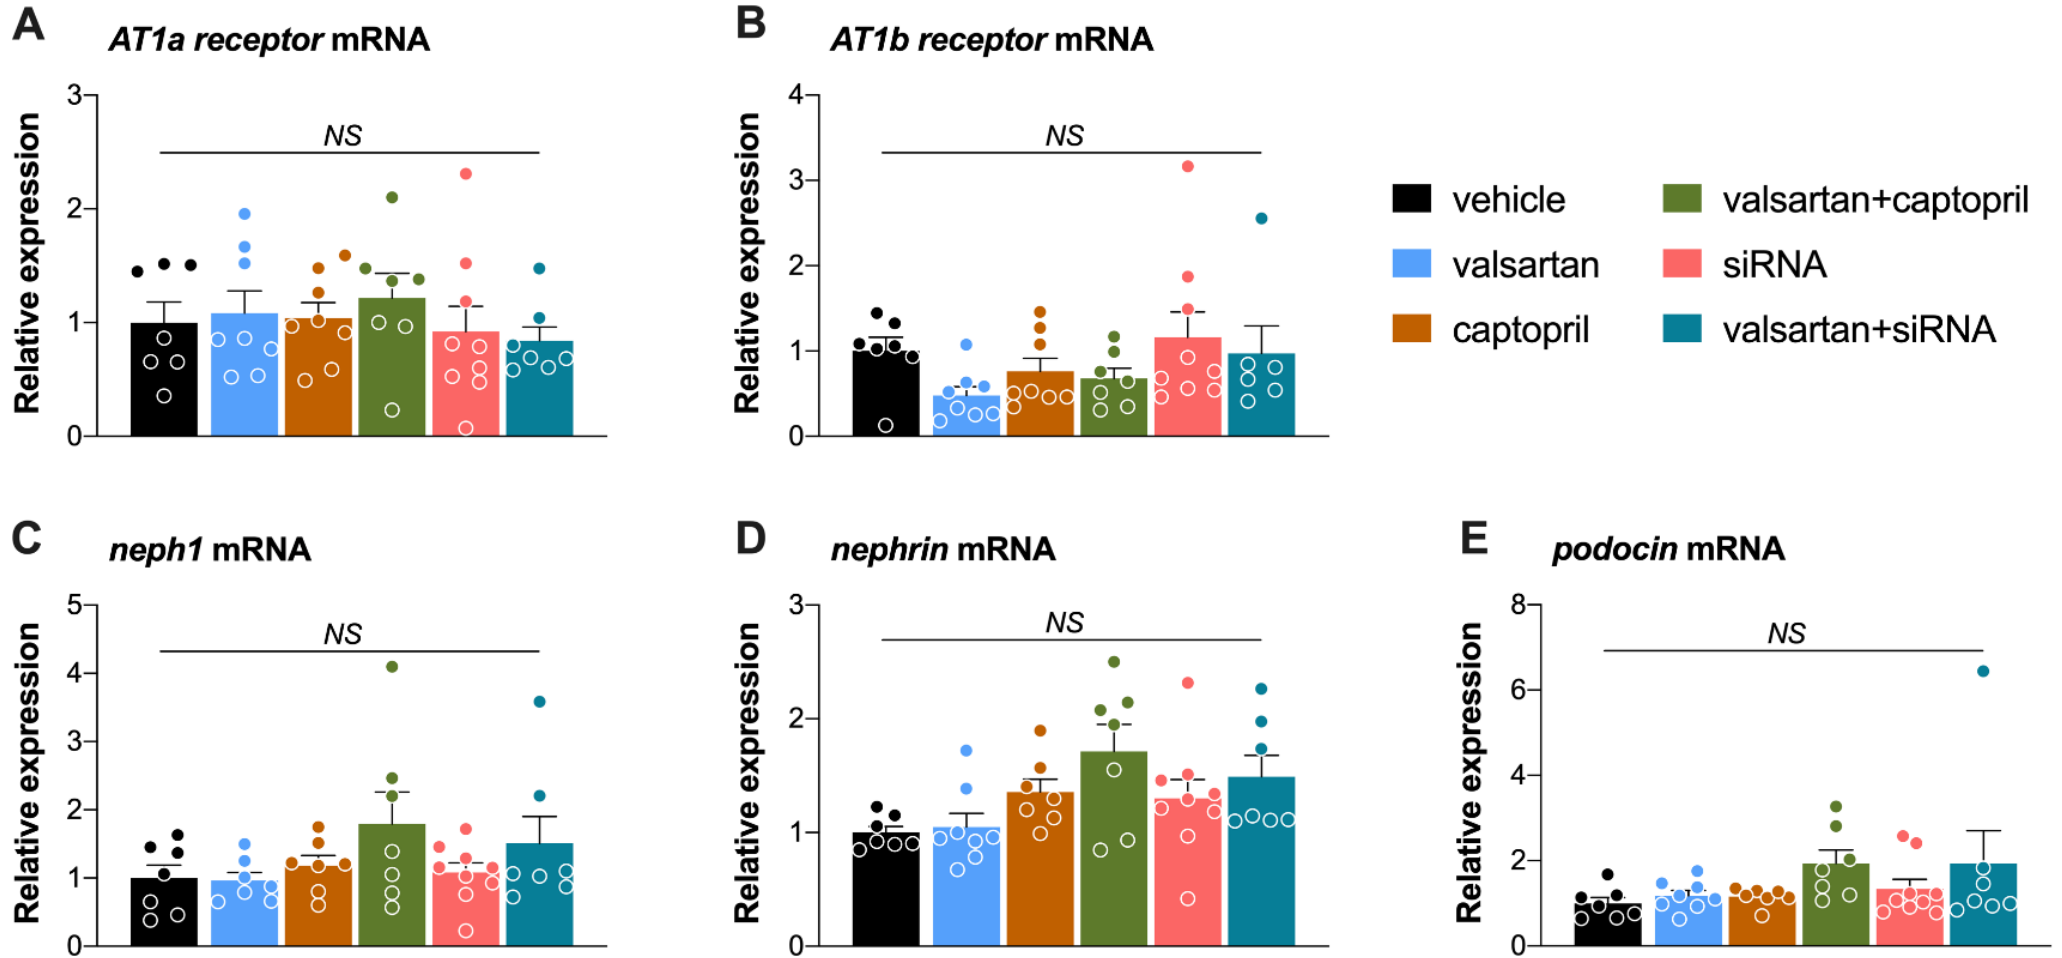

Supplement: BPH-180-80-s001.pdf [file BPH-180-80-s001.pdf]
